# Supplementary material
Source: publisher figshare collection journal article supplement (https://gsapubs.figshare.com/ndownloader/files/23296505)
Supplement: Supplementary file 1 [file 23296505]

# The effects of interannual climate variability on the moraine record

Supplemental material

## Section DR.1 On-ice near surface lapse rates

The selection of the lapse rate,  $\Gamma$ , for glaciological purposes must be made with care because reported summertime on-ice ( $\sim$  measurements only on glacier surface), near-surface ( $\sim$  measurements made 2 m above the surface) lapse rates vary by nearly a factor of eight (Table A). Since  $\Gamma$  governs how ablation changes with elevation, much of the uncertainty in the results arises from this parameter. We argue that observed on-ice, summertime lapse rates provide a better approximation of the relevant paleo lapse rates than either the standard moist adiabatic lapse rate, observed free atmospheric lapse rates, or observed off-ice (measurements made off-glacier) near-surface lapse rates— even in those in the Front Range.

Lapse rates in the free atmosphere are determined by atmospheric vertical mixing and moisture. However, surface lapse rates are controlled surface radiative transfer and by the near surface environment (surface albedo, roughness, topographic aspect, and local meteorological effects, e.g., Marshall and Sharp, 2007). While the use of modern summer near-surface temperature lapse rates from the Front Range is likely more appropriate than the often-used  $6.5\text{ }^{\circ}\text{C km}^{-1}$  moist adiabatic lapse rate, modern environmental conditions obviously differ greatly from likely summer conditions on an LGM glacier (presence of ice, reduced roughness, different elevation and topography due to the presence of the glacier). We therefore used modern on-ice near-surface temperature lapse rates to guide our uncertainty analysis. Table A shows that the most likely mean summer on-ice near surface lapse rate is  $4.9\text{ }^{\circ}\text{C km}^{-1}$  with a  $1\sigma$  value of  $1.7\text{ }^{\circ}\text{C km}^{-1}$ . Extreme mean values are  $1.1\text{ }^{\circ}\text{C km}^{-1}$  (Pasterze Glacier, Austria) and  $7.9\text{ }^{\circ}\text{C km}^{-1}$  (Greenland Ice Sheet).

Table DR.1 COMPILATION OF ON-ICE NEAR SURFACE LAPSE RATES

| Valley Glaciers                  |                |          |                                       |                     |                                 |  |
|----------------------------------|----------------|----------|---------------------------------------|---------------------|---------------------------------|--|
| Location                         | Classification | Latitude | Lapse Rate $^{\circ}\text{C km}^{-1}$ | Period of Averaging | Reference                       |  |
| Pasterze Glacier, Austria        | Valley         | 47°N     | 1.1                                   | June, July          | Greuell and Smeets, 2001        |  |
| John Evans Glacier, Canada       | Valley         | 80°N     | 1.1                                   | Summer              | Arendt and Sharp, 1999          |  |
| Pasterze Glacier, Austria        | Valley         | 47°N     | 1.4                                   | June, July          | Greuell and Smeets, 2001        |  |
| Haut Glacier, Switzerland        | Valley         | 45.97°N  | 2.0                                   | Summer              | Strasser et al., 2004           |  |
| John Evans Glacier, Canada       | Valley         | 80°N     | 3.1                                   | Summer              | Gardner et al., 2009            |  |
| Pasterze Glacier, Austria        | Valley         | 47°N     | 3.5                                   | June, August        | Denby and Greuell, 2000         |  |
| Franz Josef Glacier, New Zealand | Valley         | 43.49°N  | 4.8                                   | Annual              | Anderson et al., 2006           |  |
| Keqicar Glacier, Tien Shan       | Valley         | 41.75°N  | 5.0                                   | July                | Li et al, 2011                  |  |
| South Glacier, Yukon             | Valley         | 60.8°N   | 5.3                                   | Annual              | MacDougall and Flowers, 2011    |  |
| Storglaciären, Sweden            | Valley         | 67.9°N   | 5.5                                   | Annual              | Hock and Holmgren, 2005         |  |
| North Glacier, Yukon             | Valley         | 60.8°N   | 6.0                                   | Annual              | MacDougall and Flowers, 2011    |  |
| Keqicar Baqi, Tien Shan, China*  | Valley         | 41.75°N  | 6.0                                   | Summer              | Zhang et al., 2007*             |  |
| South Cascade Glacier, WA        | Valley         | 48.35°N  | 6.5                                   | Summer              | Anslow et al., 2008             |  |
| Juncal Norte, Chile              | Valley         | 32.6°S   | 6.5                                   | Summer              | Petersen and Pellicciotti, 2011 |  |
| Miage glacier, Italy*            | Valley         | 45.5°N   | 6.7                                   | Summer              | Brock et al., 2010*             |  |

| Baltoro Glacier, Pakistan*          | Valley                         | 35.7°N   | 7.5                            | Summer              | Mihalcea et al., 2006*      |
|-------------------------------------|--------------------------------|----------|--------------------------------|---------------------|-----------------------------|
| Milage glacier, Italy*              | Valley                         | 45.5°N   | 8.0                            | Summer              | Brock et al., 2010*         |
| Valley Glacier Mean:                |                                |          | 4.7±2.2                        | w/ debris-cover     |                             |
|                                     |                                |          | 4.0±2.1                        | w/o debris-cover    |                             |
| <b>Ice Sheet and Ice Cap</b>        |                                |          |                                |                     |                             |
| Location                            | Classification                 | Latitude | Lapse Rate °C km <sup>-1</sup> | Period of Averaging | Reference                   |
| Vatnajökull, Iceland                | Ice Cap                        | 64.1°N   | 3.6                            | Summer              | Oerlemans et al., 1999      |
| Prince of Whales Icefield, Canada   | Ice Cap                        | 78°N     | 3.7                            | JJA                 | Marshall et al., 2007       |
| Prince of Whales Icefield, Canada   | Ice Cap                        | 78°N     | 4.3                            | Summer              | Marshall et al., 2007       |
| Prince of Wales Ice Field, Canada   | Ice Cap                        | 78°N     | 4.4                            | Summer              | Marshall and Sharp, 2009    |
| Prince of Whales Icefield, Canada   | Ice Cap                        | 78°N     | 4.6                            | Summer              | Gardner et al., 2009        |
| Devon Ice Cap, Canada               | Ice Cap                        | 75.2°N   | 4.8                            | Summer              | Mair et al. 2005            |
| Prince of Whales Icefield, Canada   | Ice Cap                        | 78°N     | 4.8                            | JJA                 | Marshall et al., 2007       |
| Devon Ice Cap, Canada               | Ice Cap                        | 75.2°N   | 4.9                            | Summer              | Gardner et al., 2009        |
| Prince of Whales Icefield, Canada   | Ice Cap                        | 78°N     | 5.3                            | JJA                 | Marshall et al., 2007       |
| Langjökull, Iceland                 | Ice Cap                        | 64.5°N   | 5.6                            | JJA                 | Gudmundsson, et al, 2003    |
| Vestari Hagafellsjökull, Iceland    | Ice Cap                        | 64.5°N   | 5.7                            | Summer              | Hodgkins et al., 2012       |
| King George Island, Antarctica      | Ice Cap                        | 62.3°S   | 6                              | Summer              | Braun and Hock, 2004        |
| Aggasiz Ice Cap, Canada             | Ice Cap                        | 80.2°N   | 6.4                            | Summer              | Gardner et al., 2009        |
| Greenland Ice Sheet (>1000m a.s.l.) | Ice Sheet                      | ~67°N    | 2.4                            | Summer              | Oerlemans and Vugts, 1993   |
| Greenland Ice Sheet                 | Ice Sheet                      | 60-      | 4                              | June                | Steffen and Box, 2001       |
| NE Greenland Ice Sheet              | Ice Sheet                      | 70-      | 4                              | June, August        | Boggild et al., 1994        |
| Greenland Ice Sheet (<1000m)        | Ice Sheet                      | 60-      | 4.3                            | Summer              | Hanna et al., 2005          |
| Greenland Ice Sheet                 | Ice Sheet                      | 60-      | 5                              | June, July          | Box and Rinke, 2003         |
| Greenland Ice Sheet (<1000m)        | Ice Sheet                      | ~67°N    | 5                              | Summer              | Oerlemans and Vugts, 1993   |
| West Greenland Ice Sheet            | Ice Sheet                      | ~67°N    | 5.8                            | Mean                | van den Broeke et al., 2011 |
| Greenland Ice Sheet (<1000m)        | Ice Sheet                      | ~67°N    | 6.3                            | Summer              | Oerlemans and Vugts, 1993   |
| West Greenland Ice Sheet            | Ice Sheet                      | ~67°N    | 7.4                            | Mean                | van den Broeke et al., 2011 |
| Greenland Ice Sheet (>1000m)        | Ice Sheet                      | 60-      | 7.9                            | Summer              | Hanna et al., 2005          |
| Ice Sheet and Ice Cap Mean:         |                                |          | 5.1±1.2                        |                     |                             |
| * Debris-covered glacier            | Mean of all cited lapse rates: |          | 4.9±1.7                        | w/ debris-cover     |                             |
|                                     | Mean of all cited lapse rates: |          | 4.7±1.6                        | w/o debris-cover    |                             |

## Section DR.2 Melt-factors

The melt factor,  $\mu$ , employed in our ablation parameterization is a simplified form of the often used positive-degree-day model that relates mean summer temperatures to vertical surface mass loss. The melt factor  $\mu$  is converted from published positive-degree-day factors by assuming a melt season covering the months of June, July, and August (Table DR.2). The selection of  $\mu$  must be made with care as positive degree-day factors for snow can vary by nearly a factor of ten, and for ice by a factor of six. We combine and supplement several previous compilations of snow and ice melt-factors for modern glaciers and mountainous regions. Table DR.2 shows that the most likely positive degree day factor for ice: is 7.7 mm day<sup>-1</sup> °C<sup>-1</sup> with a 1 $\sigma$  value of 3.2 mm day<sup>-1</sup> °C<sup>-1</sup> with extreme values of 20 mm day<sup>-1</sup> °C<sup>-1</sup>; Van de Wal (1992) and 2.6 mm day<sup>-1</sup> °C<sup>-1</sup>; Zhang et al. (2006); and the most likely positive degree day factor for snow is 4.5 m °C<sup>-1</sup> a<sup>-1</sup> with a 1 $\sigma$  value of 1.7 mm day<sup>-1</sup> °C<sup>-1</sup> with extreme values of 11.6 mm day<sup>-1</sup> °C<sup>-1</sup>; Kayastha et al. (2000) and 1.4 mm day<sup>-1</sup> °C<sup>-1</sup> Howat et al. (2007). It is important to note that our parameter combinations produce mass balance values that are reasonable for continental climates.

TABLE DR.2 GLOBAL COMPILATION OF POSITIVE DEGREE-DAY MELT FACTORS ( $\text{mm } ^\circ \text{day}^{-1} \text{C}^{-1}$ )

| <b>Greenland</b>                     |         |          |           |          |                      |                          |                             |
|--------------------------------------|---------|----------|-----------|----------|----------------------|--------------------------|-----------------------------|
| Location                             | Snow    | Ice      | Elevation | Latitude | Duration             | Reference                | Cited in                    |
| Thule Ramp, Greenland                |         | 12       | 570       | 76°25'N  | 1 Jul - 31 Jul 1954  | Schytt, 1955             | Hock, 2003                  |
| Thule Ramp, Greenland                |         | 7        | 570       |          | 1 Aug-31 Aug 1954    | Schytt, 1955             | Hock, 2003                  |
| Camp IV-EGIG, Greenland              |         | 18.6     | 1013      | 69°40'N  | Melt season 1959     | Ambach, 1988a            | Hock, 2003                  |
| GIMEX profile, Greenland             |         | 8.7      | 341       | 67°06'N  | 10 Jun-31 Jul 1991   | Van de Wal, 1992         | Hock, 2003                  |
| GIMEX profile, Greenland             |         | 9.2      | 519       | 67°06'N  | 15 Jun-6 Aug 1991    | Van de Wal, 1992         | Hock, 2003                  |
| GIMEX profile, Greenland             |         | 20       | 1028      | 67°04'N  | 15 Jun-6 Aug 1991    | Van de Wal, 1992         | Hock, 2003                  |
| Qamanārssúp sermia, Greenland        | 2.8     | 7.3      | 370-1410  | 64°28'N  | 1979-1987            | Johannesson et al., 1995 | Hock, 2003                  |
| Qamanārssúp sermia, Greenland        | 2.9     | 8.2      | 790       | 64°28'N  | 512 days (1980-86)   | Braithwaite, 1995        | Hock, 2003                  |
| Nordboglacier, Greenland             | 3.7     | 7.5      | 880       | 61°28'N  | 415 days (1979-83)   | Braithwaite, 1995        | Hock, 2003                  |
| Kronprins Christian Land, Greenland  |         | 9.8      | 380       | 79°54'N  | 8 Jul - 27 Jul 1999  | Braithwaite et al., 1998 | Hock, 2003                  |
| Hans Tausen Ice Cap, Greenland       |         | 5.9      | 540       | 82°49'N  | 2 Jul-5 Aug 1994     | Braithwaite et al., 1998 | Hock, 2003                  |
| Qamanārssúp sermia, Greenland        | 2.5     | 7.7      | ~800      | 64°28'N  | Summer               | Braithwaite, 1989        | Braithwaite and Zhang, 2000 |
| Qamanārssúp sermia, Greenland        |         | 7.9      | 790       | 64°28'N  | May-Sep 1980-1986    | Braithwaite, 1993        | Braithwaite and Zhang, 2000 |
| <i>Greenland means:</i>              |         |          |           |          |                      |                          |                             |
|                                      | 3.0±0.5 | 10.0±4.4 |           |          |                      |                          |                             |
| <b>Europe/Americas/NZ</b>            |         |          |           |          |                      |                          |                             |
| Location                             | Snow    | Ice      | Elevation | Latitude | Duration             | Reference                | Cited in                    |
| Aletshgletscher, Switzerland         |         | 11.7     | 2220      | 46°27' N | 2 Aug - 27 Aug, 1965 | Lang, 1986               | Hock, 2003                  |
| Ålfotbreen, Norway                   | 4.5     | 6        | 850-1400  | 61°45'N  | 1961-1990            | Laumann and Reeh, 1993   | Hock, 2003                  |
| Ålfotbreen, Norway                   | 3.5     | 5.5      | 1450-2200 | 61°34'N  | 1961-1990            | Laumann and Reeh, 1993   | Hock, 2003                  |
| Ålfotbreen, Norway                   | 4       | 5.5      | 300-2000  | 61°41'N  | 1961-1990            | Laumann and Reeh, 1993   | Hock, 2003                  |
| Nigardsbreen, Norway                 | 4.4     | 6.4      | 300-2000  | 61°41'N  | 1964-1990            | Johannesson et al., 1995 | Hock, 2003                  |
| Storglaciären, Sweden                | 3.2     |          | 1550      | 67°55'N  | 5 Jul-7 Sep 1993     | Hock, 1999               | Hock, 2003                  |
| Storglaciären, Sweden                |         | 6        | 1370      | 67°55'N  | 5 Aug - 12 Aug 1993  | Hock, 1999               | Hock, 2003                  |
| Storglaciären, Sweden                |         | 6.4      | 1370      | 67°55'N  | 19 Jul-27 Aug 1994   | Hock, 1999               | Hock, 2003                  |
| Storglaciären, Sweden                |         | 5.4      | 1250      | 67°55'N  | 9 Jul-4 Sep 1994     | Hock, 1999               | Hock, 2003                  |
| Vestfonna, Spitzbergen               |         | 13.8     | 310-410   | ~80°N    | 26 Jun - 5 Aug 1958  | Schytt, 1964             | Hock, 2003                  |
| Satujökull, Iceland                  | 5.6     | 7.7      | 800-1800  | ~65°N    | 1987-1992            | Johannesson et al., 1995 | Hock, 2003                  |
| Aletshgletscher, Switzerland         | 5.3     |          | 3366      | 46°27' N | 3 Aug-19 Aug, 1973   | Lang, 1986               | Hock, 2003                  |
| John Evans Glacier, Canada           | 5.5     |          | 260       | 79°40' N | 27 Jun-29 Jun 1996   | Arendt and Sharp, 1999   | Hock, 2003                  |
| John Evans Glacier, Canada           | 4.1     |          | 820       | 79°40' N | 19 Jun - 14 Jul 1996 | Arendt and Sharp, 1999   | Hock, 2003                  |
| John Evans Glacier, Canada           | 3.9     |          | 820       | 79°40' N | 23 May - 1 Jul 1998  | Arendt and Sharp, 1999   | Hock, 2003                  |
| John Evans Glacier, Canada           | 3.9     |          | 1180      | 79°40' N | 25 Jun-19 Jul 1996   | Arendt and Sharp, 1999   | Hock, 2003                  |
| John Evans Glacier, Canada           | 2.7     |          | 1180      | 79°40' N | 31 May - 19 Jul 1996 | Arendt and Sharp, 1999   | Hock, 2003                  |
| John Evans Glacier, Canada           |         | 7.6      | 260       | 79°40' N | 4 Jul - 16 Jul 1996  | Arendt and Sharp, 1999   | Hock, 2003                  |
| John Evans Glacier, Canada           |         | 8.1      | 820       | 79°40' N | 15 Jul - 19 Jul 1996 | Arendt and Sharp, 1999   | Hock, 2003                  |
| John Evans Glacier, Canada           |         | 5.5      | 820       | 79°40' N | 2 Jul -19 Jul 1998   | Arendt and Sharp, 1999   | Hock, 2003                  |
| Weissfluhjoch, Switzerland           | 4.2     |          | 2540      | 46°48'N  | 28 year record       | de Quervain, 1979        | Braithwaite and Zhang, 2000 |
| Franz Josef Glacier, New Zealand     | 3       | 6        | 122       | 43°28'N  | Summer               | Woo and Fitzharris, 1992 | Braithwaite and Zhang, 2000 |
| Saint Supphellebreen, Norway         |         | 6.3      |           | 61°30'N  | Summer               | Orheim, 1970             | Braithwaite and Zhang, 2000 |
| Glacier de Sarnes, France            | 3.8     | 6.2      | ~3000     | 45°10'N  | Summer               | Vincent and Vallon, 1997 | Braithwaite and Zhang, 2000 |
| Griesgletscher, Switzerland          |         | 8.9      | 2287      | 46°39'N  | 112 summer days      | Braithwaite, 2000        | Braithwaite and Zhang, 2000 |
| Australian Alps                      | 2.9     |          | 1250      | 36°30'S  | 1966-1985            | Whetton, et al., 1996    | Brugger, 2010               |
| Blöndujökull, Kv íslajökull, Iceland | 4.5     | 5        | 115       | 64°50'N  | Summer               | Johannesson, 1997        | Brugger, 2010               |
| Illvirajökull, Iceland               | 5.6     | 7.6      | 115       | 64°50'N  | Summer               | Johannesson, 1997        | Brugger, 2010               |
| Glacier Upsala, Patagonia            |         | 7.1      | 350       | 49°58'S  | Summer 1993-1994     | Naruse et al., 1997      | Brugger, 2010               |
| South Cascade Glacier, USA           |         | 6.2      | 1980      | 48°21'N  | Summer               | Tangborn, 1999           | Brugger, 2010               |
| Rabots Glacier, Sweden               | 4.7     | 6.8      | ~1300     | 67°55'N  | Summer               | Refsnider, 2001          | Brugger, 2010               |
| Sverdrup Glacier, Canada             |         | 4        | 300       | 75°N     | Summer 1963          | Braithwaite, 1981        |                             |

| Andrews Glacier, USA                  | 4.3  |      |           |          | Summer              | Outcalt and MacPhail, 1965 | Lauman & Reeh, 1993         |
|---------------------------------------|------|------|-----------|----------|---------------------|----------------------------|-----------------------------|
| Storsteinsfjellbreen, Norway          | 5.6  | 7.5  |           | 68°15'N  | Summer              | Pytte and Liestol, 1966    | Lauman & Reeh, 1993         |
| Storbreen, Norway                     |      | 5.5  |           | 61°34'N  | Summer 1949-1965    | Liestol, 1967              | Lauman & Reeh, 1993         |
| White Glacier, Canada                 |      | 4.9  | 210       | 79°N     | Summer 1960-1962    | Braithwaite, 1981          |                             |
| Alfotbreen, Norway                    | 5.3  | 7.5  |           | 61°45'N  | Summer 1965         | NVE, 1965                  | Lauman & Reeh, 1993         |
| Various Swiss glaciers                |      | 6    |           | ~46°30'N | Summer              | Kasser, 1959               | Braithwaite and Zhang, 2000 |
| Fillefjell, Norway                    | 3.9  |      |           | 61°10'N  | Summer 1967-1964    | Furmyr and Tollan, 1975    | Lauman & Reeh, 1993         |
| Moreno glacier, Argentina             |      | 7    | 330       | 50°28'S  | 1993 -1994          | Takeuchi et al., 1996      | Hock, 2003                  |
| Martial Este Glacier, Argentina       | 4.7  | 9.4  | 990       | 54°47'S  | Dec 2005 - Feb 2006 | Buttstadt et al., 2009     |                             |
| Haut Glacier d'Arolla, Switzerland    | 7.7  | 10.8 | ~2900     | 45°58'N  | May - Sep 2001      | Pellicciotti et al., 2005  |                             |
| Mount Shasta, Cascade Range, USA      | 1.6  | 6.9  | 2600      | 41°12'N  | May - Nov 2002      | Howat et al., 2007         |                             |
| Mount Shasta, Cascade Range, USA      | 1.4  | 5.5  | 3000      | 41°12'N  | May - Nov 2002      | Howat et al., 2007         |                             |
| Hansbreen, Svalbard                   | 6    | 8.3  | 180       | 77°05'N  | JJA, 2008           | Grabiec et al., 2012       |                             |
| Franz Josef Glacier, New Zealand      | 4.6  | 7.1  |           | 43°28'N  | Summer              | Anderson, 2004             |                             |
| Hansbreen, Svalbard                   |      | 6.8  | 316       | 77°05'N  | 1994-1995           | Szafranec, 2002            |                             |
| Gran Campo Nevado Ice Cap, Chile      |      | 7.6  | 450       | 53°S     | Feb - Apr 2000      | Schneider et al., 2007     |                             |
| Tasman Glacier, New Zealand           |      | 4.5  | 1360      | 43°37'S  | 1985-1986           | Kirkbride, 1995            |                             |
| Tasman Glacier, New Zealand           |      | 5    | 1360      | 43°37'S  | 1986-1987           | Kirkbride, 1995            |                             |
| Tasman Glacier, New Zealand           |      | 3.9  | 960       | 43°37'S  | 1985-1986           | Kirkbride, 1995            |                             |
| Tasman Glacier, New Zealand           |      | 3.6  | 960       | 43°37'S  | 1986-1987           | Kirkbride, 1995            |                             |
| Glacier de Saint-Sorlin, France       | 4    | 6.4  | 2760      | 45°N     | 21 Jul- 31 Jul 2006 | Six et al., 2009           |                             |
| Koryto Glacier, Kamchatk, Russia      | 4.7  | 7    | 810       | 54°50'N  | 7 Aug-12 S. 2000    | Konya et al., 2004         |                             |
| <i>Europe/America/NZ means:</i>       |      |      |           |          |                     |                            |                             |
| <i>4.3±1.3 6.8±2.0</i>                |      |      |           |          |                     |                            |                             |
| <b>Central Asia</b>                   |      |      |           |          |                     |                            |                             |
| Location                              | Snow | Ice  | Elevation | Latitude | Duration            | Reference                  | Cited in                    |
| Urumqi glacier, Tien Shan, China      | 6.3  | 8.5  | 3831-3945 | ~42°N    | 1986-1993           | Liu et al., 1996           | Zhang_etal 2006             |
| Urumqi glacier, Tien Shan, China      |      | 7.3  | 3754-3898 | ~42°N    | 1986-1988           | Liu et al., 1996           | Zhang_etal 2006             |
| Urumqi glacier, Tien Shan, China      | 3.1  |      | 4048      | ~42°N    | 1986-1993           | Liu et al., 1996           | Zhang_etal 2006             |
| Keqicar Baqi, Tien Shan, China        |      | 4.5  | 3347      | ~42°N    | 28 Jun- 12 Sep 2003 | Zhang et al., 2005         | Zhang_etal 2006             |
| Keqicar Baqi, Tien Shan, China        |      | 7    | 4216      | ~42°N    | 11 Jul-13 Sep 2003  | Zhang et al., 2005         | Zhang_etal 2006             |
| Qiongtailan glacier, Tien Shan, China |      | 4.5  | 3675      | ~42°N    | 17 Jun- 14 Aug 1978 | Zhang et al., 2006         |                             |
| Qiongtailan glacier, Tien Shan, China |      | 7.3  | 4100      | ~42°N    | 25 Jun-14 Aug 1978  | Zhang et al., 2006         |                             |
| Qiongtailan glacier, Tien Shan, China |      | 8.6  | 4200      | ~42°N    | 21 Jun-31 Jul 1978  | Zhang et al., 2006         |                             |
| Qiongtailan glacier, Tien Shan, China | 3.4  |      | 4400      | ~42°N    | 21 Jun- 11 Aug 1978 | Zhang et al., 2006         |                             |
| Hailuoguo, Hengduan mtns, China       |      | 5    | 3301      | ~30°N    | Aug 1982- Aug 1983  | Zhang et al., 2006         |                             |
| Baishuihe Hengduan mtns, China        |      | 13.3 | 4600      | ~30°N    | 23 Jun- 30 Aug 1982 | Zhang et al., 2006         |                             |
| Baishuihe, Hengduan mtns, China       | 5.9  |      | 4800      | ~30°N    | 26 Jun- 11 Jul 1982 | Zhang et al., 2006         |                             |
| Dagongba glacier, Hengduan, China     |      | 13.2 | 4540      | ~30°N    | Sep 1982- Sep 1983  | Zhang et al., 2006         |                             |
| Xiaogongba glacier, China             |      | 12   | 4550      | ~30°N    | Jul 1982- Jul 1983  | Zhang et al., 2006         |                             |
| Batura, Karakoram, China              |      | 3.4  | 2780      | ~36°N    | Jun-Aug 1975        | Zhang et al., 2006         |                             |
| Teram Kangri, Karakoram, China        |      | 5.9  | 4630      | ~36°N    | 25 Jun- 7 Sep 1987  | Zhang et al., 2006         |                             |
| Teram Kangri, Karakoram, China        |      | 6.4  | 4650      | ~36°N    | 24 Jun- 7 Sep 1987  | Zhang et al., 2006         |                             |
| Qirbulake, Karakoram, China           |      | 2.6  | 4750      | ~36°N    | 6 Jun- 30 Jul 1960  | Zhang et al., 2006         |                             |
| Yangbulake, Karakoram, China          |      | 4.3  | 4800      | ~36°N    | 1 Jul - 5 Jul 1987  | Zhang et al., 2006         |                             |
| Meikuang, Kunlun Shan, China          |      | 3    | 4840      | ~36°N    | 7 May- Sep 1989     | Zhang et al., 2006         |                             |
| Halong, Kunlun Shan, China            |      | 4.7  | 4616      | ~36°N    | 15 Jun- 28 Jun 1981 | Zhang et al., 2006         |                             |
| Halong, Kunlun Shan, China            |      | 3.6  | 4900      | ~36°N    | 14 Jun 27 Jun 1981  | Zhang et al., 2006         |                             |
| Xiaodongkemadi, Tanggula, China       |      | 13.8 | 5425-5475 | ~32°30'N | Jul- Aug 1993       | Kayastha et al., 2003      | Zhang_etal., 2006           |
| Qiyi, Qilian Shan, China              |      | 7.2  | 4305-4619 | ~39°N    | Jul- Aug 2002       | Kayastha et al., 2003      | Zhang_etal., 2006           |
| Kangwure, Himalaya, China             |      | 9    | 5700-6000 |          | 20 Jul-25 Aug 1993  | Zhang et al., 2006         |                             |
| Urumqi Glacier, Tien shan, China      | 5.2  | 8.4  |           | ~42°N    | Summer              | Cui, 2009                  | Xianzhong, et al., 2010     |

|                                  |                |                |      |          |                     |                         |                         |
|----------------------------------|----------------|----------------|------|----------|---------------------|-------------------------|-------------------------|
| Urumqi Glacier, Tien shan, China | 3.1            | 7.1            |      | ~42°N    | Summer              | Cui, 2009               | Xianzhong, et al., 2010 |
| Urumqi Glacier, Tien shan, China | 5.2            | 7.1            |      | ~42°N    | Summer              | Cui, 2009               | Xianzhong, et al., 2010 |
| Urumqi Glacier, Tien shan, China |                | 4              |      | ~42°N    | Summer              | Cui, 2009               | Xianzhong, et al., 2010 |
| Baishui Glacier, Hengduan, China |                | 4.92           | 4200 | 26°00'N  | 26 Jun-11 Jul 1982  | Liu, 1996               | Xianzhong, et al., 2010 |
| Baishui Glacier, Hengduan, China |                | 10.3           | 4600 | 26°00'N  | Sept 2008           | Xianzhong, et al., 2010 |                         |
| Baishui Glacier, Hengduan, China |                | 13.6           | 4700 | 26°00'N  | Sept 2008           | Xianzhong, et al., 2010 |                         |
| Baishui Glacier, Hengduan, China |                | 14.1           | 4800 | 26°00'N  | Sept 2008           | Xianzhong, et al., 2010 |                         |
| Baishui Glacier, Hengduan, China | 2.4            |                | 4400 | 26°00'N  | 13 May-6 Jun 2009   | Xianzhong, et al., 2010 |                         |
| Baishui Glacier, Hengduan, China | 2.8            |                | 4500 | 26°00'N  | 13 May-6 Jun 2009   | Xianzhong, et al., 2010 |                         |
| Baishui Glacier, Hengduan, China | 4.6            |                | 4600 | 26°00'N  | 5 May - 6 Jun 2009  | Xianzhong, et al., 2010 |                         |
| Baishui Glacier, Hengduan, China | 5.2            |                | 4700 | 26°00'N  | 13 May-6 Jun 2009   | Xianzhong, et al., 2010 |                         |
| Baishui Glacier, Hengduan, China | 5.8            |                | 4800 | 26°00'N  | 13 May - 6 Jun 2009 | Xianzhong, et al., 2010 |                         |
| Dokriani Glacier, Himalaya       | 5.9            |                | 4000 | 31°45' N | 4 Jun-6Jun 1995     | Singh and Kumar, 1996   | Hock, 2003              |
| Dokriani Glacier, Himalaya       | 5.7            | 7.4            | 4000 | 31°45' N | 4 days (1997-98)    | Singh et al., 2000a,b   | Hock, 2003              |
| Glacier AX010, Himalaya          | 7.3            | 8.1            | 4956 | 27°45' N | Jun-Aug 1978        | Kayastha et al., 2000a  | Hock, 2003              |
| Glacier AX010, Himalaya          | 8.7            | 8.8            | 5072 | 27°45' N | Jun-Aug 1978        | Kayastha et al., 2000a  | Hock, 2003              |
| Glacier AX010, Himalaya          | <b>11.6</b>    |                | 5245 | 27°45' N | 1 Jun-31 Aug 1978   | Kayastha et al., 2000a  | Hock, 2003              |
| Khumbu Glacier, Himalaya         |                | 16.9           | 5350 | 28°00'N  | 21 May-1 Jun 1999   | Kayastha et al., 2000b  | Hock, 2003              |
| Rakhiot Glacier, Himalaya        |                | 6.6            | 3350 | 35°22'N  | 18 Jul-6 Aug 1986   | Kayastha et al., 2000b  | Hock, 2003              |
| Yala Glacier, Himalaya           |                | 9.3            | 5120 | 28°14'N  | 1 Jun-31 Jul 1996   | Kayastha, 2001          | Hock, 2003              |
| Yala Glacier, Himalaya           |                | 10.1           | 5270 | 28°14'N  | 1 Jun-31 Jul 1996   | Kayastha, 2001          | Hock, 2003              |
| <i>Central Asia means:</i>       | <i>5.4±2.3</i> | <i>7.9±3.6</i> |      |          |                     |                         |                         |

#### Non-glaciated Sites

| Location                                                   | Snow                  | Ice                   | Elevation | Latitude | Duration          | Reference             | Cited in   |
|------------------------------------------------------------|-----------------------|-----------------------|-----------|----------|-------------------|-----------------------|------------|
| Gooseberry Creek, Utah, USA                                | 2.5                   |                       | 2650      | ~38°N    | 23 Apr-9 May 1928 | Clyde, 1931           | Hock, 2003 |
| Weissfluhjoch, Switzerland                                 | 4.5                   |                       | 2540      | 46°48'N  | Snowmelt season   | Zingg, 1951           | Hock, 2003 |
| 3 basins in USA                                            | 2.7                   |                       |           |          | Several seasons   | C. of Engineers, 1956 | Hock, 2003 |
| 3 basins in USA                                            | 4.9                   |                       |           |          | Several seasons   | C. of Engineers, 1956 | Hock, 2003 |
| Former European USSR                                       | 5.5                   | 7                     | 1800-3700 |          |                   | Kuzmin, 1961, p. 117  | Hock, 2003 |
| 12 sites in Finland                                        | 3.9                   |                       |           | ~60-68°N | 1959-1978         | Kuusisto, 1980        | Hock, 2003 |
| <i>Non-glaciated site means:</i>                           | <i>4.0±1.2</i>        | <i>7.0</i>            |           |          |                   |                       |            |
| <i>Mean meltfactor for all examples in the literature:</i> | <b><i>4.5±1.7</i></b> | <b><i>7.7±3.2</i></b> |           |          |                   |                       |            |

### Section DR.3 Discussion of terminal moraine assumptions

In order to support our assumption that terminal moraines can form during advances driven by interannual variability without long term terminus standstills (< 50 years; a time scale supported by flowline modeling (see Roe, 2011 Figure 4)), we present a review of the moraine sedimentological literature (Table DR.3), which shows that the majority of moraines with constrained formation periods form over periods less than 50 years. The development of a universal model for the timescale of moraine formation has been hampered by the complexity of formational processes, the abundance of unconstrainable variables and initial conditions. But it is important to note that all moraine formation timescales found in the literature were less than 50 years. The length of time needed to form terminal moraines is dependent on the process of formation and can be constrained only crudely. Ice marginal indicators are typically divided into glaciotectonic, push, hummocky, drop moraines, and ice-contact fans but composite moraines are common (Benn and Evans, 1998). For the purposes of justifying the short timescale of ice marginal deposit formation (<50 years), we further divide the indicators into those that are independent of terminus standstills (glaciotectonic, push and hummocky moraines) and those that are dependent on terminus standstills (drop moraines and ice-contact fans). Note the dominance of push moraines in the table. The authors made no attempt to bias the type of moraines presented in this table. Rather more research has been focused on push moraines or push moraines are more common. We use the broad, continuum definition of push moraines used in Bennett (2001).

TABLE DR.3 COMPILATION OF MORaine FORMATION TIMES.

| Region                                              | Time period   | Type                 | Sub-Category                    | Formation Time        | Height   | Reference                  |
|-----------------------------------------------------|---------------|----------------------|---------------------------------|-----------------------|----------|----------------------------|
| <b>Moraines independent of terminus standstills</b> |               |                      |                                 |                       |          |                            |
| Argentina                                           | Modern        | Glaciotectonic       | Folding and Thrusting           | <13 years             | 15-50m   | Glasser & Hambrey, 2002    |
| Svalbard                                            | Modern        | Push                 | Surge                           | Likely <5yrs          | 30-40m   | Boulton et al., 1999       |
| Svalbard                                            | LIA           | Push                 | Englacial thrusts               |                       | 45m      | Hambrey & Huddart, 1995    |
| Chile                                               | Neoglacial    | Push                 | Formed of subglacial clasts     |                       | 20-40m   | Glasser et al., 2006       |
| Svalbard                                            | Neoglacial    | Thrust               | Melt out thrust                 | Formed upon retreat   | 40m      | Bennett et al., 1996       |
| Iceland                                             | LIA           | Glaciotectonic       | Fold and thrust                 | 2-6 days              | 10-40m   | Benediktsson et al., 2010  |
| Baffin I., Canada                                   | Neoglacial    | Push                 | Pushed outwash gravels          | 1 yr                  | 40m      | Boulton et al., 1986       |
| Iceland                                             | LIA           | Push                 | Single large nappe and faulting | <39 likely 1 or 2 yrs | 8m, 35m  | Bennett et al., 2004       |
| Svalbard                                            | LIA           | Push/Thrust          | Surge                           | <1 yr                 | >30m     | Hart & Watts, 1997         |
| Svalbard                                            | LIA           | Ice Cored            | Retreating from LIA maximum     | Formed upon retreat   | 25-30m   | Lyså & Lønne, 2001         |
| Iceland                                             | LIA           | Glaciotectonic       | Fold and thrust                 | 12 yrs at terminus    | 25-30m   | Bennett et al., 2000       |
| Norway                                              | Modern        | Push?                | 2 year advance                  | 2 years               | 20m      | Benedict et al., 2013      |
| Svalbard                                            | LIA           | Push                 | 1882/1886 Surge                 | <1 yrs                | 1-20m    | Boulton et al., 1996       |
| New Zealand                                         | LGM           | Push/Thrust          |                                 | Likely <30 yrs        | 10-15m   | Hart, 1996                 |
| Iceland                                             | Modern        | Push                 | Imbricate                       | 1 yr                  | 1-10m    | Humlum, 1985               |
| Alaska                                              | Modern        | Push                 |                                 | Sustained adv.        | 10m      | Motyka & Echelmeyer, 2003  |
| Norway                                              | LIA/ modern   | Push                 | Bulldozing and thrusting        | 1-10 yrs              | 3-8m     | Burki et al., 2009         |
| Yukon, Canada                                       | LIA/ modern   | Ice Cored            | Debris thickness reported       |                       | 1-6m     | Johnson, 1972              |
| Iceland                                             | Modern        | Push                 | Polygenetic push                | Seasonal              | .4-5.25m | Sharp, 1984                |
| Iceland                                             | LIA           | Push/Thrust          | 1890 Surge                      | 1 day                 | 5m       | Benediktsson et al., 2008  |
| Iceland                                             | Modern        | Push                 | Annual moraines                 | Seasonal              | 4m       | Sharp, 1984                |
| Iceland                                             | Modern        | Push/Basal Freezing  |                                 | 1 year                | 3.5-4m   | Krüger, 1993               |
| Iceland                                             | Modern        | Push                 |                                 | 1 year                | 3.5m     | Krüger, 1993               |
| Norway                                              | Modern        | Push                 | From six separate glaciers      | 1 year sustained adv  | 1-3m     | Winkler & Matthews, 2010   |
| Alaska                                              | Modern        | Ice Cored/ Push      | Readvance in a surging glacier  | 1 year                | 3m       | Johnson, 1971              |
| Iceland                                             | Modern        | Ice Cored            | Debris thickness reported       | 1 year                | 1-3m     | Krüger & Kjær, 2000        |
| Argentina                                           | Modern        | Push                 |                                 | 1 yr                  | 2.5m     | Rabassa et al., 1979       |
| Iceland                                             | Modern        | Push                 |                                 | Seasonal              | 1-2m     | Boulton, 1986              |
| Switzerland                                         | Modern        | Push                 | Annual winter advances          | Seasonal              | <1.5m    | Lukas, 2012                |
| Norway                                              | Modern        | Push                 | Annual winter advances          | Seasonal              | <1m      | Benedict et al., 2013      |
| Iceland                                             | Modern        | Push                 | Lodgement freeze on             | Seasonal              | .3 -.7m  | Krüger, 1995               |
| New Zealand                                         | Modern        | Ice Cored            | Debris thickness reported       | 1-2 years             | .4m      | Brook & Paine, 2011        |
| Region                                              | Time period   | Type                 | Sub-Category                    | Formation Time        | Height   | Reference                  |
| <b>Moraines dependent on terminus standstills</b>   |               |                      |                                 |                       |          |                            |
| Colorado, USA                                       | LGM           | Ice Contact Fan      | Debris flow and alluvium        | <20 years             | 25m      | Johnson and Gillham, 1995  |
| France                                              | LIA           | Ice Contact Fan/Dump | Formed over 3 advances          | ~10 years             | 20m      | Nussbaumer & Zumbühl, 2012 |
| Scotland, UK                                        | Younger Dryas | Ice Contact Fan/push | Debris flow and alluvium        | 3-9 or 7-19 years     | 15m      | Benn & Lukas, 2006         |

|         |        |                 |                      |                        |      |                     |
|---------|--------|-----------------|----------------------|------------------------|------|---------------------|
| Iceland | Modern | Ice Contact Fan | Outwash fans/ sandar | <10years               | 10m  | Boulton, 1986       |
| Iceland | Modern | Dump/push       | Initially push       | 7 years sustained adv. | 4-7m | Krüger et al., 2002 |

\* LIA refers to the Little Ice Age  
\*\* LGM refers to the Last Glacial Maximum

### *Moraines independent of glacial standstills*

The most rapidly forming moraines require the propagation of debris in front of an advancing ice front (e.g. Krüger, 1995; Benediktsson, et al., 2010; Benediktsson et al., 2008; Boulton, 1986; Humlum, 1985). Because the material is bulldozed or thrust in front of the glacier, the moraine can form during any advance and retreat cycle irrespective of time spent in standstill. The formation of glaciotectionic and push moraines is more dependent on the availability of sediment or permafrost in the foreland than it is on the glaciological conditions (Bennett, 2001). *Glaciotectionic Moraines* are formed when the stress imposed by an advancing glacier excavates and elevates (associated with thrusting and folding) proglacial bedrock and/or quaternary sediments. *Push Moraines* are formed by the bulldozing of proglacial sediment and typically have steep proximal and gentle distal slopes. Advances over long distances can result in formation of a more extensive set of moraine ridges. *Hummocky and ice-cored moraines* form when heavily debris-covered ice is dynamically separated from an active, retreating glacier (Lyså and Lonne, 2001). As these moraines are in place as soon as the ice is dynamically separated from the active glacier, all that remains is for the ice core to waste away. Ice-cored and hummocky moraines do not require a glacial standstill to form (Glassner and Hambrey, 2002; Johnson, 1972) and their identification in the moraine record implies that the moraine was emplaced instantaneously for the timescales of interest for this study.

### *Moraines dependent on glacial standstills*

Latero-frontal fans and dump moraine sizes are dependent on the debris flux off the glacier and the length of time the glacier terminus remains stationary. A glacier that advances and retreats without a terminus standstill will not likely form an ice-contact fan or a dump moraine, although there are reported occurrences in the literature. One of these potential influences is thick supraglacial debris-cover, which can slow terminus oscillations and provide the debris fluxes to create large moraines. *Ice-contact fans* form by the coalescence of debris fans and glaciofluvial processes at the glacier terminus. Although latero-frontal fans can form over short periods and even in a single short-lived advance, these fans are typically on the order 10 meters in height whereas fans that limit subsequent ice advances are typically 100s of meters in height (Benn and Lukas, 2006; Benn and Evans, 1998). *Dump Moraines* are formed by the delivery of supraglacial material derived from rockfall onto the glacier or the melt out of basal debris septa that flows or falls off the terminal ice slope. Paleoglacier valleys with large ice-contact fans (>100 m in height) or dump moraines should be treated with more caution than moraines that are independent of glacial standstills. Nearly all documented terminal moraine formation durations are less than 20 years (Table DR.3). Further sedimentological and stratigraphic investigation of LGM terminal moraines is needed to constrain the importance of moraine formation timescale on paleoclimate reconstruction (e.g., Johnson and Gillam, 1995).

### *Terminal moraines do not limit subsequent advances*

We have assumed that the furthest length excursion from the mean glacier length forms the maximum terminal moraine. In effect, this requires that that previously formed moraines do not limit the extent of subsequent advances. The only moraine types that have been shown to limit subsequent advances are large latero-frontal moraines or scree aprons; these are common in tectonically active regions such as the Himalaya or the Andes. These moraines can become sufficiently massive to dam glacier ice and cause subsequent glacial advances to terminate at the same location (Lliboutry, 1977; Thorarinsson, 1956). This effect is especially apparent where large lateral moraines are deposited outside of cirques and steep valleys and are therefore less susceptible to paraglacial processes (Thorarinsson, 1956). Cases where latero-terminal moraines could have limited ice extent are easily identifiable by the height and extent of the latero-frontal moraines. These situations are uncommon in LGM terminal moraines in the Western US.

*Overridden terminal moraines are destroyed*

Moraines can be overrun by subsequent advances and still be identifiable upon retreat (Karlén, 1973; Bennett et al., 2000). Overrun moraines may be differentiated from moraines that haven't been overrun by their subdued topography compared to moraines down valley, the presence of fluted till overriding the moraine, and the presence of lateral continuations of the moraine that have not been overridden that exhibit a sharper morphology (Karlén, 1973). Preservation of overrun moraines is rare and the potential for preservation depends on the local bedrock topography and the amount of time the overrun moraine is subjected to subglacial processes. An overrun moraine could potentially pose a problem for paleoclimatic or mean glacial length reconstruction only if a moraine is overrun and there is no indication of the maximum extent of the overriding glacier. The overrun moraine would then be interpreted as the maximum extent of the glacier for the time period of interest and could produce substantial error. This situation is unlikely for LGM moraines, as any overrun moraine would have been smoothed by the overriding glacier and then subjected to at least 10 thousand years of diffusional surface process that would further obliterate the morainal form.



#### ***Section DR 4. LGM moraine complexes***

LGM ‘terminal moraines’ in the western US are often composed of a conglomeration of moraines formed during numerous glacier advances. We call these clusters of moraines, terminal moraine complexes keeping in mind that it is possible that these clusters of ridges were formed by a single advance and the individual moraines interpreted as terminal moraines are actually fault bend folds from a glaciotectonic push moraine. Below in figure B we present a LiDAR hillshade of the Teton Glacier LGM terminal moraine and our interpretation of distinct terminal moraines and the subjective limits of the terminal moraine complex. This hillshade allows us to define many more ice marginal features than possible without detailed field surveys. The terminal moraines defined in figure B are likely formed between the LGM mean length and the maximum terminal moraine (labeled 1) and are therefore likely candidates for moraines formed by glacier length fluctuations driven by interannual variability.

Figure DR.4 LiDAR of the LGM Teton glacier terminal moraines. In the bottom panel we show what we interpret to be 14 distinct ice margins revealed by the LiDAR. The LiDAR is courtesy of OpenTopography.

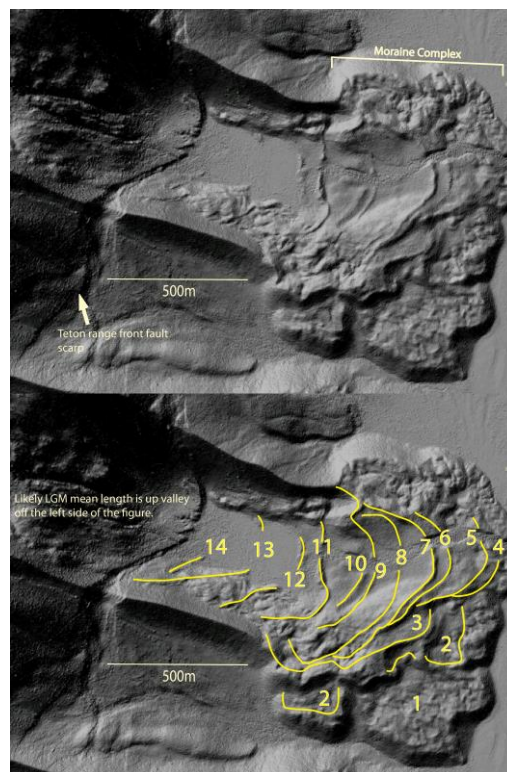

### ***DR.5 Relative sensitivity of length fluctuations due to temperature and precipitation variability***

Roe and O’Neal (2009) show that the relative sensitivity of a glacier’s fluctuations to temperature vs. precipitation variability is given by:

$$R = \frac{A_{T>0}\mu\sigma_T}{A_{tot}\sigma_P} .$$

The  $R$  values for Front Range glaciers greater than 4 km<sup>2</sup> range between 2.2 and 2.9 with a mean of 2.5, suggesting that year-to-year variations in summer temperature were two to three times as important for driving length perturbations as were variations in annual precipitation. This dominant sensitivity to summertime temperature variation is expected in continental climates.

### ***Section DR.6 Flowline model description***

We follow standard equations for the shallow-ice-approximation incorporating glacier sliding (e.g., Oerlemans, 2001):

$$\frac{dH(x)}{dt} = \dot{b}(x) - \frac{dF(x)}{dx}; F(x) = r^3 g^3 \left( f_d H(x)^2 + f_s \right) H(x)^3 \zeta \frac{dz_s}{dx} \frac{\rho}{\rho_0}, \quad (1)$$

where  $H(x)$  is ice thickness at position  $x$ ,  $\dot{b}(x)$  is the local net mass balance,  $F(x)$  is the depth-integrated ice flux,  $\rho$  is ice density,  $g$  is the acceleration due to gravity,  $dz_s/dx$  is the local ice surface slope,  $f_d = 1.9 \times 10^{-24} \text{ Pa}^3 \text{ s}^{-1}$  and  $f_s = 5.7 \times 10^{-20} \text{ Pa}^3 \text{ m}^2 \text{ s}^{-1}$  (the coefficients of deformation and sliding).

### ***Section DR.7 Model discussion***

By exploring a very wide parameter space, we have constrained the effects of interannual variability on glacial length and moraine formation over extreme bounds. The range of parameter uncertainty could be better constrained by examining how the climate parameters vary in space from the LGM to the present. The most uncertain climate parameters,  $\Gamma$ ,  $\sigma_P$ , and  $\sigma_T$ , could be better constrained by using atmospheric circulation model output, and better minimum estimates of  $D$  could be obtained by reducing the uncertainty in moraine-derived dates. It should also be determined if using higher order ice physics models changes the effects of interannual variability on glacier length, although we anticipate that parameter uncertainty will swamp any differences between models. In the climate forcing presented here, we have assumed that  $T$  and  $P$  are uncorrelated from year-to-year (white noise), as is generally the case for centennial-scale instrumental observations of  $T$  and  $P$  and glacier mass balance records (e.g., Burke and Roe, 2013); on longer time-scales, paleoclimate records show that a degree of persistence (correlation from year-to-year) does exist (e.g., Huybers and Curry, 2006). Even a small degree of persistence can substantially increase the magnitude of fluctuations (e.g. Reichert et al., 2001). For this reason and others outlined in Roe and O’Neal (2009), we feel that our estimates of the fluctuation of glacier length about the mean length are conservative.

### ***Section DR. 8 Explanation of Interannual Variability***

Interannual climate variability refers to changes in the mean value of climate parameters (air temperature, precipitation, etc.) from year-to-year. Think of last year's mean summer temperature compared to this year's mean summer temperature (same can be done for total winter precipitation or annual precipitation). The variation from one year to the next is what we refer to as interannual variability. When long records of mean summer temperature (or annual precip) are tested for year-to-year correlation (if we have a warm summer relative to the long term mean this year are we more likely to have a warm summer next year?) there is little evidence of correlation (Burke and Roe, 2013). Interannual records of summer temperature show very little or no correlation from one year to the next and are best represented as white noise (equal power at all frequencies). The change in weather from year-to-year is not considered a climate change so glacier fluctuations forced by interannual variability are independent of climate change.

### ***References for supplementary material***

- Anderson, B.M., 2004, The response of “Ka Roimata o Hine Hukaterere” Franz Josef Glacier to climate change [Ph.D. Thesis]: Christchurch, University of Canterbury, 106 p.
- Anderson, B.M., Lawson, W., Owens, I., and Goodsell, B., 2006, Past and future mass balance of “Ka Roimata o Hine Hukaterere” Franz Josef Glacier, New Zealand: *Journal of Glaciology*, v. 52, no. 179, p. 597–607, doi: 10.3189/172756506781828449.
- Anslow, F.S., Hostetler, S., Bidlake, W.R., and Clark, P.U., 2008, Distributed energy balance modeling of South Cascade Glacier, Washington and assessment of model uncertainty: *Journal of Geophysical Research*, v. 113, no. F2, p. F02019, doi: 10.1029/2007JF000850.
- Arendt, A., and Sharp, M., 1999, Energy balance measurements on a Canadian high arctic glacier and their implications for mass balance modelling: IAHS Publication, 165-172.
- Benediktsson, Í.Ö., Möller, P., Ingólfsson, Ó., Van der Meer, J.J.M., Kjær, K.H., and Krüger, J., 2008, Instantaneous end moraine and sediment wedge formation during the 1890 glacier surge of Brúarjökull, Iceland: *Quaternary Science Reviews*, v. 27, no. 3-4, p. 209–234, doi: 10.1016/j.quascirev.2007.10.007.
- Benediktsson, Í.Ö., Schomacker, A., Lokrantz, H., and Ingólfsson, Ó., 2010, The 1890 surge end moraine at Eyjabakkajökull, Iceland: a re-assessment of a classic glaciotectionic locality: *Quaternary Science Reviews*, v. 29, no. 3-4, p. 484–506, doi: 10.1016/j.quascirev.2009.10.004.
- Benn, D. I., and Evans, D. J., 1998, *Glaciers and glaciation*: London. Edward Arnold. 734 p.
- Benn, D.I., and Lukas, S., 2006, Younger Dryas glacial landsystems in North West Scotland: an assessment of modern analogues and palaeoclimatic implications: *Quaternary Science Reviews*, v. 25, no. 17-18, p. 2390–2408, doi: 10.1016/j.quascirev.2006.02.015.
- Bennett, M.R., 2001, The morphology, structural evolution and significance of push moraines: *Earth-Science Reviews*, v. 53, no. 3-4, p. 197–236, doi: 10.1016/S0012-8252(00)00039-8.
- Bennett, M., Huddart, D., Hambrey, M.J., and Ghiene, J.F., 1996, Moraine development at the high-arctic valley glacier Pedersenbreen, Svalbard: *Geografiska Annaler. Series A*, v. 78, no. 4, p. 209–222.
- Bennett, M.R., Huddart, D., and McCormick, T., 2000, An integrated approach to the study of glaciolacustrine landforms and sediments: a case study from Hagavatn, Iceland: *Quaternary Science Reviews*, v. 19, no. 7, p. 633–665, doi: 10.1016/S0277-3791(99)00013-X.

- Bennett, M., Huddart, D., Waller, R., Cassidy, N., Tomio, a, Zukowskyj, P., Midgley, N., Cook, S., Gonzalez, S., and Glasser, N., 2004, Sedimentary and tectonic architecture of a large push moraine: a case study from Hagafellsjökull-Eystri, Iceland: *Sedimentary Geology*, v. 172, no. 3-4, p. 269–292, doi: 10.1016/j.sedgeo.2004.10.002.
- Benson, L., Madole, R., Landis, G., and Gosse, J., 2005, New data for Late Pleistocene Pinedale alpine glaciation from southwestern Colorado: *Quaternary Science Reviews*, v. 24, no. 1-2, p. 49–65, doi: 10.1016/j.quascirev.2004.07.018.
- Bøggild, C., Reeh, N., and Oerter, H., 1994, Modelling ablation and mass-balance sensitivity to climate change of Storstrømmen, northeast Greenland: *Global and Planetary Change*, v. 9, p. 79–90.
- Boulton, G., 1986, Push-moraines and glacier-contact fans in marine and terrestrial environments: *Sedimentology*, v. 33, p. 677–698.
- Boulton, G.S., Van Der Meer, J.J.M., Hart, J., Beets, D., Ruegg, G.H.J., Van Der Waterer, Jarvis, J., 1996, Till and moraine emplacement in a deforming bed surge— An example from a marine environment: *Quaternary Science Reviews*, v. 15, no. 95, p. 961–987.
- Boulton, G.S., Van Der Meer, J.J.M., Beets, D.J., Hart, J.K., and Ruegg, G.H.J., 1999, The sedimentary and structural evolution of a recent push moraine complex : Holmstrombreen , Spitsbergen: *Quaternary Science Reviews*, v. 18, p. 339–371.
- Box, J., and Rinke, A., 2003, Evaluation of Greenland ice sheet surface climate in the HIRHAM regional climate model using automatic weather station data: *Journal of Climate*, v. 16, p. 1302–1319.
- Braithwaite, R.J., 1981, On glacier energy balance, ablation, and air temperature. *Journal of Glaciology*, v. 27, p. 381–391.
- Braithwaite, R.J., and Zhang, Y., 2000, Sensitivity of mass balance of five Swiss glaciers to temperature changes assessed by tuning a degree-day model: *Journal of Glaciology*, v. 46, no. 152, p. 7–14.
- Braun, M., and Hock, R., 2004, Spatially distributed surface energy balance and ablation modelling on the ice cap of King George Island (Antarctica): *Global and Planetary Change*, v. 42, no. 1-4, p. 45–58, doi: 10.1016/j.gloplacha.2003.11.010.
- Brock, B.W., Mihalcea, C., Kirkbride, M.P., Diolaiuti, G., Cutler, M.E.J., and Smiraglia, C., 2010, Meteorology and surface energy fluxes in the 2005–2007 ablation seasons at the Miage debris-covered glacier, Mont Blanc Massif, Italian Alps: *Journal of Geophysical Research*, v. 115, no. D9, p. D09106, doi: 10.1029/2009JD013224.
- Brook, M.S., and Paine, S., 2012, Ablation of Ice-Cored Moraine in a Humid, Maritime Climate: Fox Glacier, New Zealand: *Geografiska Annaler: Series A, Physical Geography*, v. 94, no. 3, p. 339–349, doi: 10.1111/j.1468-0459.2011.00442.x.
- Brugger, K.A., 2010, Climate in the Southern Sawatch Range and Elk Mountains, Colorado, U.S.A., during the Last Glacial Maximum: Inferences using a simple degree-day model: *Arctic, Antarctic, and Alpine Research*, v. 42, no. 2, p. 164–178, doi: 10.1657/1938-4246-42.2.164.
- Brugger, K.A., 2007, Cosmogenic  $^{10}\text{Be}$  and  $^{36}\text{Cl}$  ages from Late Pleistocene terminal moraine complexes in the Taylor River drainage basin, central Colorado, USA: *Quaternary Science Reviews*, v. 26, no. 3-4, p. 494–499, doi: 10.1016/j.quascirev.2006.09.006.
- Burki, V., Larsen, E., Fredin, O., and Margreth, A., 2009, The formation of sawtooth moraine ridges in Bødalen, western Norway: *Geomorphology*, v. 105, no. 3-4, p. 182–192, doi: 10.1016/j.geomorph.2008.06.016.

- Buttstadt, M., Moller, M., Iturraspe, R., and Schneider, C., 2009, Mass balance evolution of Martial Este Glacier, Tierra del Fuego (Argentina) for the period 1960 – 2009: *Advances in Geosciences*, v. 22, p. 117–124.
- Denby, B., and Greuell, W., 2000, The use of bulk and profile methods for determining surface heat fluxes in the presence of glacier winds: *Journal of Glaciology*, v. 46, no. 154, p. 445–452, doi: 10.3189/172756500781833124.
- Gardner, A.S., Sharp, M.J., Koerner, R.M., Labine, C., Boon, S., Marshall, S.J., Burgess, D.O., and Lewis, D., 2009, Near-surface temperature lapse rates over Arctic glaciers and their implications for temperature downscaling: *Journal of Climate*, v. 22, no. 16, p. 4281–4298, doi: 10.1175/2009JCLI2845.1.
- Glasser, N.F., and Hambrey, M.J., 2002, Sedimentary facies and landform genesis at a temperate outlet glacier: Soler Glacier, North Patagonian Icefield: *Sedimentology*, v. 49, no. 1, p. 43–64, doi: 10.1046/j.1365-3091.2002.00431.x.
- Glasser, N.F., Jansson, K., Mitchell, W. a., and Harrison, S., 2006, The geomorphology and sedimentology of the “Témpanos” moraine at Laguna San Rafael, Chile: *Journal of Quaternary Science*, v. 21, no. 6, p. 629–643, doi: 10.1002/jqs.1002.
- Gosse, J.C., Klein, J., Lawn, B., Middleton, R., and Evenson, E.B., 1995, Beryllium-10 dating of the duration and retreat of the last Pinedale glacial sequence: *Science (New York, N.Y.)*, v. 268, no. 5215, p. 1329–33, doi: 10.1126/science.268.5215.1329.
- Grabiec, M., Budzik, T., and Głowacki, P., 2012, Modeling and hindcasting of the mass balance of Werenskiöldbreen (Southern Svalbard): *Arctic, Antarctic, and Alpine Research*, v. 44, no. 2, p. 164–179.
- Greuell, W., and Smeets, P., 2001, Variations with elevation in the surface energy balance on the Pasterze (Austria): *Journal of Geophysical Research*, v. 106, no. D23, p. 31717–31727.
- Gümundsson, S., Björnsson, H., Pálsson, F., and Haraldsson, H.H., 2003, Physical energy balance and degree-day models of summer ablation on Langjökull ice cap, SW-Iceland: National Power Company of Iceland.
- Hambrey, M.J., and Huddart, D., 1995, Englacial and proglacial glaciotectionic processes at the snout of a thermally complex glacier in Svalbard: *Journal of Quaternary Science*, v. 10, p. 313–326.
- Hanna, E., Huybrechts, P., Janssens, I., Cappelen, J., Steffen, K., and Stephens, A., 2005, Runoff and mass balance of the Greenland ice sheet: 1958–2003: *Journal of Geophysical Research*, v. 110, no. D13, p. D13108, doi: 10.1029/2004JD005641.
- Hart, J.K., 1996, Proglacial glaciotectionic deformation associated with glaciolacustrine sedimentation, Lake Pukaki, New Zealand: *Journal of Quaternary Science*, v. 11, no. 2, p. 149–160, doi: 10.1002/(SICI)1099-1417(199603/04)11:2<149::AID-JQS227>3.0.CO;2-2.
- Hart, J.K., and Watts, R.J., 1997, A comparison of the styles of deformation associated with two recent push moraines, South Van Keulenfjorden, Svalbard: *Earth Surface Processes and Landforms*, v. 22, no. 12, p. 1089–1107, doi: 10.1002/(SICI)1096-9837(199712)22:12<1089::AID-ESP804>3.0.CO;2-8.
- He, X., Du, J., Ji, Y., Zhang, N., Li, Z., Wang, S., and Theakstone, W.H., 2010, Characteristics of DDF at Baishui Glacier No. 1 region in Yulong Snow Mountain: *Journal of Earth Science*, v. 21, no. 2, p. 148–156, doi: 10.1007/s12583-010-0013-4.
- Hock, R., 2003, Temperature index melt modelling in mountain areas: *Journal of Hydrology*, v. 282, no. 1-4, p. 104–115, doi: 10.1016/S0022-1694(03)00257-9.
- Hock, R., and Holmgren, B., 2005, A distributed surface energy-balance model for complex

- topography and its application to Storglaciären, Sweden: *Journal of Glaciology*, v. 51, no. 172, p. 25–36.
- Hodgkins, R., Carr, S., Pálsson, F., Gu"mundsson, S., and Björnsson, H., 2013, Modelling variable glacier lapse rates using ERA-Interim reanalysis climatology: an evaluation at Vestari- Hagafellsjökull, Langjökull, Iceland: *International Journal of Climatology*, v. 33, no. 2, p. 410–421, doi: 10.1002/joc.3440.
- Howat, I.M., Tulaczyk, S., Rhodes, P., Israel, K., and Snyder, M., 2006, A precipitation-dominated, mid-latitude glacier system: Mount Shasta, California: *Climate Dynamics*, v. 28, no. 1, p. 85–98, doi: 10.1007/s00382-006-0178-9.
- Humlum, O., 1985, Genesis of an imbricate push moraine, Höfdabrekkujökull, Iceland: *The Journal of Geology*, v. 93, p. 185–195.
- Johnson, M.D., and Gillam, M.L., 1995, Composition and construction of late Pleistocene end moraines, Durango, Colorado: *GSA Bulletin*, v. 107, no. 10, p. 1241–1253.
- Johnson, P.G., 1971, Ice cored moraine formation and degradation, Donjek Glacier, Yukon Territory, Canada: *Geografiska Annaler: Series A, Physical Geography*, v. 53, no. 3/4, p. 198–202.
- Johnson, P.G., 1972, A possible advanced hypsithermal position of the Donjek Glacier: *Arctic*, v. 25, n. 4, p. 302–305.
- Karlén, W., 1973, Holocene glacier and climatic variations, Kebnekaise mountains, Swedish Lapland: *Geografiska Annaler., Series A*, v. 55, no. A, p. 29–63.
- Kayastha, R.B., Ageta, Y., Nakawo, M., Fujita, K., Sakai, A., and Matsuda, Y., 2003, Positive degree-day factors for ice ablation on four glaciers in the Nepalese Himalayas and Qinghai-Tibetan Plateau: *Bulletin of glaciological research*, v. 20, p. 7–14.
- Kirkbride, M.P., 1995, Relationships between temperature and ablation on the Tasman Glacier, Mount Cook National Park, New Zealand: *Relationships between temperature and ablation on the Tasman Glacier, Mount Cook National Park, N: New Zealand Journal of Geology and Geophysics*, v. 38, p. 17–27.
- Konya, K., Matsumoto, T., and Naruse, R., 2004, Surface heat balance and spatially distributed ablation modelling at Koryto Glacier, Kamchatka peninsula, Russia: *Geografiska Annaler: Series A*, v. 86, no. 4, p. 337–348.
- Krüger, J., 1993, Moraine-ridge formation along a stationary ice front in Iceland: *Boreas*, v. 22, no. 2, p. 101–109.
- Krüger, J., 1995, Origin, chronology and climatological significance of annual-moraine ridges at Myrdalsjökull, Iceland: *The Holocene*, v. 5, no. 4, p. 420–427.
- Krüger, J., and Kjær, K.H., 2000, De-icing progression of ice-cored moraines in a humid, subpolar climate, Kötlujökull, Iceland: *The Holocene*, v. 10, no. 6, p. 737–747, doi: 10.1191/09596830094980.
- Krüger, J., Kjær, K.H., Van Der Meer, J.J.M., 2002, From push moraine to single-crested dump moraine during a sustained glacier advance: *Norwegian Journal of Geography*, no. 4, p. 37–41.
- Laabs, B.J.C., Marchetti, D.W., Munroe, J.S., Refsnider, K.A., Gosse, J.C., Lips, E.W., Becker, R.A., Mickelson, D.M., and Singer, B.S., 2011, Chronology of latest Pleistocene mountain glaciation in the western Wasatch Mountains, Utah, U.S.A.: *Quaternary Research*, v. 76, no. 2, p. 272–284, doi: 10.1016/j.yqres.2011.06.016.
- Laabs, B.J.C., Plummer, M.A., and Mickelson, D.M., 2006, Climate during the last glacial maximum in the Wasatch and southern Uinta Mountains inferred from glacier modeling:

- Geomorphology, v. 75, no. 3-4, p. 300–317, doi: 10.1016/j.geomorph.2005.07.026.
- Laumann, T., and Reeh, N., 1993, Sensitivity to climate change of the mass balance of glaciers in southern Norway: *Journal of Glaciology*, v. 39, no. 133.
- Li, J., Liu, S., Zhang, Y., and Shangguan, D., 2011, Surface energy balance of Keqicar Glacier, Tianshan Mountains, China, during ablation period: *Sciences in Cold and Arid Regions*, v. 3, no. 3, p. 197–205, doi: 10.3724/SP.J.1226.2011.00197.
- Licciardi, J.M., Clark, P.U., Brook, E.J., Elmore, D., and Sharma, P., 2004, Variable responses of western U.S. glaciers during the last deglaciation: *Geology*, v. 32, no. 1, p. 81, doi: 10.1130/G19868.1.
- Lliboutry, L., Arnao, B.M., and Schneider, B., 1977, Glaciological problems set by the control of dangerous lakes in Cordillera Blanca, Peru. III Study of moraines and mass balances at Safuna: *Journal of Glaciology*, v. 18, no. 79, p. 275–290.
- Lukas, S., 2012, Processes of annual moraine formation at a temperate alpine valley glacier: insights into glacier dynamics and climatic controls: *Boreas*, v. 41, no. 3, p. 463–480, doi: 10.1111/j.1502-3885.2011.00241.x.
- Lyså, A. and Lønne, I., 2001, Moraine development at a small high-arctic valley glacier: Rieperbreen, Svalbard: *Journal of Quaternary Science*, v. 16, no. 6, p. 519–529, doi: 10.1002/jqs.613.
- MacDougall, A.H., and Flowers, G.E., 2011, Spatial and temporal transferability of a distributed energy-balance glacier melt model: *Journal of Climate*, v. 24, p. 1480–1498, doi: 10.1175/2010JCLI3821.1.
- Mair, D., Burgess, D.O., and Sharp, M.J., 2005, Thirty-seven year mass balance of Devon Ice Cap, Nunavut, Canada, determined by shallow ice coring and melt modeling: *Journal of Geophysical Research*, v. 110, no. F1, p. F01011, doi: 10.1029/2003JF000099.
- Marshall, S.J., and Sharp, M.J., 2009, Temperature and Melt Modeling on the Prince of Wales Ice Field, Canadian High Arctic: *Journal of Climate*, v. 22, no. 6, p. 1454–1468, doi: 10.1175/2008JCLI2560.1.
- Marshall, S., Sharp, M., Burgess, D.O., and Anslow, F.S., 2007, Near-surface temperature lapse rates on the Prince of Wales Icefield, Ellesmere Island, Canada: Implications for regional downscaling of temperature: *International journal of ...*, v. 398, no. September 2006, p. 385–398, doi: 10.1002/joc.
- Mihalcea, C., Mayer, C., Diolaiuti, G., Lambrecht, A., Smiraglia, C., and Tartari, G., 2006, Ice ablation and meteorological conditions on the debris-covered area of Baltoro glacier, Karakoram, Pakistan: *Annals of Glaciology*, v. 43, no. 1894, p. 292–300.
- Motyka, R.J., and Echelmeyer, K. a., 2003, Taku Glacier (Alaska, U.S.A.) on the move again: active deformation of proglacial sediments: *Journal of Glaciology*, v. 49, no. 164, p. 50–58, doi: 10.3189/172756503781830962.
- Munroe, J.S., Laabs, B.J.C., Shakun, J.D., Singer, B.S., Mickelson, D.M., Refsnider, K. A., and Caffee, M.W., 2006, Latest Pleistocene advance of alpine glaciers in the southwestern Uinta Mountains, Utah, USA: Evidence for the influence of local moisture sources: *Geology*, v. 34, no. 10, p. 841, doi: 10.1130/G22681.1.
- Nussbaumer, S.U., Nesje, A., and Zumbühl, H.J., 2011, Historical glacier fluctuations of Jostedalsbreen and Folgefonna (southern Norway) reassessed by new pictorial and written evidence: *The Holocene*, v. 21, no. 3, p. 455–471, doi: 10.1177/0959683610385728.
- Nussbaumer, S.U., and Zumbühl, H.J., 2011, The Little Ice Age history of the Glacier des Bossons (Mont Blanc massif, France): a new high-resolution glacier length curve based on

- historical documents: *Climatic Change*, v. 111, no. 2, p. 301–334, doi: 10.1007/s10584-011-0130-9. gsa 2013 schedule
- Oerlemans, J., Kuhn, M., Obleitner, F., Pálsson, F., Smeets, C.J.P.P., Vugts, H.F., and Wolde, J.D.E., 1999, Glacio-meteorological investigations on Vatnajökull, Iceland, summer 1996: An overview: *Boundary Layer Meteorology*, v. 92, p. 3–26.
- Oerlemans, J., and Vugts, H., 1993, A meteorological experiment in the melting zone of the Greenland ice sheet: *Bulletin of the American Meteorological Society*, v. 74, no. 3, p. 355–365, doi: 10.1175/1520-0477(1993)074<0355:AMEITM>2.0.CO;2.
- Oerlemans, J., *Glaciers and Climate Change*: Lisse, NL, Swets and Zeitlinger, 160 p.
- Pellicciotti, F., Brock, B., Strasser, U., Burlando, P., Funk, M., and Corripio, J., 2005, An enhanced temperature-index glacier melt model including the shortwave radiation balance#: development and testing for Haut Glacier d’Arolla, Switzerland: *Journal of Glaciology*, v. 51, no. 175, p. 573–587, doi: 10.3189/172756505781829124.
- Petersen, L., and Pellicciotti, F., 2011, Spatial and temporal variability of air temperature on a melting glacier: Atmospheric controls, extrapolation methods and their effect on melt modeling, Juncal Norte Glacier, Chile: *Journal of Geophysical Research*, v. 116, no. D23, p. D23109, doi: 10.1029/2011JD015842.
- Phillips, F., and Zreda, M., 1997, Cosmogenic  $^{36}\text{Cl}$  and  $^{10}\text{Be}$  ages of Quaternary glacial and fluvial deposits of the Wind River Range, Wyoming: *GSA Bulletin*, v. 109, no. 11, p. 1453–1463.
- Porter, S.C., and Swanson, T.W., 2008,  $^{36}\text{Cl}$  dating of the classic Pleistocene glacial record in the northeastern Cascade Range, Washington: *American Journal of Science*, v. 308, no. 2, p. 130–166, doi: 10.2475/02.2008.02.
- Rabassa, J., Rubulis, S., & Suárez, J., 1979, Rate of formation and sedimentology of (1976–1978) push-moraines, Frías Glacier, Mount Tronador (41 10\$ S; 71 53\$ W), Argentina: *Moraines and Varves*, 65–79.
- Reinardy, B.T.I., Leighton, I., and Marx, P.J., 2013, Glacier thermal regime linked to processes of annual moraine formation at Midtdalsbreen, southern Norway: *Boreas*, no. 1971, p. n/a–n/a, doi: 10.1111/bor.12008.
- Roe, G.H., 2011, What do glaciers tell us about climate variability and climate change?: *Journal of Glaciology*, v. 57, no. 203, p. 567–578, doi: 10.3189/002214311796905640.
- Roe, G.H., and O’Neal, M.A., 2009, The response of glaciers to intrinsic climate variability: observations and models of late-Holocene variations in the Pacific Northwest: *Journal of Glaciology*, v. 55, no. 193, p. 839–854, doi: 10.3189/002214309790152438.
- Schildgen T.F., and Dethier D.P., 2000, Fire and ice: using isotopic dating techniques to interpret the geomorphic history of Middle Boulder Creek, Colorado. *Geological Society of America Abstracts with Programs* 32(7): 18.
- Schneider, C., Kilian, R., and Glaser, M., 2007, Energy balance in the ablation zone during the summer season at the Gran Campo Nevado Ice Cap in the Southern Andes: *Global and Planetary Change*, v. 59, no. 1–4, p. 175–188, doi: 10.1016/j.gloplacha.2006.11.033.
- Sharp, M., 1984, annual moraine ridges at Skálafellsjökull southeast Iceland: *Journal of Glaciology*, v. 30, no. 104, p. 82–93.
- Six, D., Wagnon, P., Sicart, J.E., and Vincent, C., 2009, Meteorological controls on snow and ice ablation for two contrasting months on Glacier de Saint-Sorlin, France: *Annals of Glaciology*, v. 50, p. 66–72.
- Steffen, K., and Box, J., 2001, Surface climatology of the Greenland ice sheet: *Greenland*



- Climate Network 1995–1999: *Journal of Geophysical Research*, v. 106, no. D24, p. 33951–33964.
- Strasser, U., Corripio, J., Pellicciotti, F., Burlando, P., Brock, B., and Funk, M., 2004, Spatial and temporal variability of meteorological variables at Haut Glacier d’Arolla (Switzerland) during the ablation season 2001: Measurements and simulations: *Journal of Geophysical Research*, v. 109, p. D03103, doi: 10.1029/2003JD003973.
- Szafranec, J., 2002, Influence of positive degree % days and sunshine duration on the surface ablation of Hansbreen, Spitsbergen glacier: *Polish Polar Research*, v. 23, no. 3, p. 227–240.
- Thorarinsson, S., 1956, On the variations of Svinafellsjökull, Skaftafellsjökull and Kviarjökull in Oraefi: Jökull, v. 6, p. 1–15.
- Van den Broeke, M.R., Smeets, C.J.P.P., and Van de Wal, R.S.W., 2011, The seasonal cycle and interannual variability of surface energy balance and melt in the ablation zone of the west Greenland ice sheet: *The Cryosphere*, v. 5, no. 2, p. 377–390, doi: 10.5194/tc-5-377-2011.
- Van de Wal, R., 1992, Ice and climate. PhD Thesis, Utrecht University, 144 pp.
- Ward, D.J., Anderson, R.S., Guido, Z.S., and Briner, J.P., 2009, Numerical modeling of cosmogenic deglaciation records, Front Range and San Juan mountains, Colorado: *Journal of Geophysical Research*, v. 114, no. F1, p. F01026, doi: 10.1029/2008JF001057.
- Winkler, S., and Matthews, J. A., 2010, Observations on terminal moraine-ridge formation during recent advances of southern Norwegian glaciers: *Geomorphology*, v. 116, no. 1-2, p. 87–106, doi: 10.1016/j.geomorph.2009.10.011.
- Worsley, P., and Alexander, M.J., 1976, Glacier and Environmental Changes. Neoglacial Data from the Outermost Moraine Ridges at Engabreen, Northern Norway: *Geografiska Annaler. Series A, Physical Geography*, v. 58, no. 1/2, p. 55, doi: 10.2307/520743.
- Yong, Z., Shiyin, L., and Yongjian, D., 2007, Glacier meltwater and runoff modelling, Keqicar Baqi glacier, southwestern Tien Shan, China: *Journal of Glaciology*, v. 53, no. 180, p. 91–98, doi: 10.3189/172756507781833956.
- Young, N.E., Briner, J.P., Leonard, E.M., Licciardi, J.M., and Lee, K., 2011, Assessing climatic and nonclimatic forcing of Pinedale glaciation and deglaciation in the western United States: *Geology*, v. 39, no. 2, p. 171–174, doi: 10.1130/G31527.1.
- Zhang, Y., Liu, S., and Ding, Y., 2006, Observed degree-day factors and their spatial variation on glaciers in western China: *Annals of Glaciology*, v. 43, no. 1, p. 301–306.
- Zumbühl, H.J., Steiner, D., and Nussbaumer, S.U., 2008, 19th century glacier representations and fluctuations in the central and western European Alps: An interdisciplinary approach: *Global and Planetary Change*, v. 60, no. 1-2, p. 42–57, doi: 10.1016/j.gloplacha.2006.08.005.
